# Supplementary material
Source: publisher figshare collection journal article supplement (https://gsajournals.figshare.com/ndownloader/files/21459402)
Supplement: Supplementary file 1 [file 21459402]

## Sheet: Sheet1
Table S1. Sample Information
Sample ID	Sample Number	DHSN	Sex	Barcode Sequence	DHSN Phenotype Group	Sequencing Coverage (X)
sam_31_abs	31	0	m	CGATA	Absence	17.62
sam_32_abs	32	0	m	CGGCG	Absence	27.1
sam_35_abs	35	0	m	GAAGC	Absence	17.28
sam_38_abs	38	0	m	GAGAT	Absence	15.16
sam_39_abs	39	0	m	GCGCC	Absence	20.97
sam_40_abs	40	0	m	TAGCA	Absence	15.66
sam_41_abs	41	0	m	AATTT	Absence	19.87
sam_42_abs	42	0	m	CTGAA	Absence	31.3
sam_46_abs	46	0	f	ACCAT	Absence	18.42
sam_57_abs	57	0	m	TCGAG	Absence	23.15
sam_58_abs	58	0	m	CTAGG	Absence	15.75
sam_59_abs	59	0	m	GCATT	Absence	12.54
sam_60_abs	60	0	m	TAATG	Absence	20.06
sam_62_abs	62	0	m	TCAGA	Absence	19.39
sam_70_abs	70	0	m	AACCC	Absence	13.97
sam_20_pre	20	3	m	CCGGT	Presence	20.35
sam_21_pre	21	2.5	m	TGACC	Presence	23.25
sam_22_pre	22	2.5	m	GGGGA	Presence	21.54
sam_36_pre	36	2.5	m	ACTGC	Presence	14.06
sam_37_pre	37	2	m	GGAAG	Presence	17.2
sam_44_pre	44	3.5	f	AAGGG	Presence	15.07
sam_49_pre	49	3	f	TTAAT	Presence	19.42
sam_51_pre	51	3.5	f	GTGTG	Presence	18.08
sam_64_pre	64	2.5	m	CAACT	Presence	16.76
sam_66_pre	66	2	m	GTACA	Presence	20.92
sam_68_pre	68	2	m	TGGTT	Presence	11.58
sam_69_pre	69	2	m	CCAAC	Presence	17.19
sam_78_pre	78	3	f	CAGTC	Presence	15.21
sam_80_pre	80	3	f	ACGTA	Presence	22.42
sam_81_pre	81	3	f	TTGGC	Presence	23.42
		*DHSN=Dorsal Hindwing Spot Number
